# Supplementary material
Source: HighWire-hosted journal article supplement (https://jnis.bmj.com/highwire/filestream/175998/field_highwire_adjunct_files/1/jnis-2022-019777supp002_data_supplement.pdf)
Supplement: jnis-2022-019777supp002_data_supplement.pdf [file jnis-2022-019777supp002_data_supplement.pdf]

Supplemental Table-2

**Stroke Diagnosis Codes**

|        |                                                                                                  |
|--------|--------------------------------------------------------------------------------------------------|
| G450   | Vertebro-basilar artery syndrome                                                                 |
| G451   | Carotid artery syndrome (hemispheric)                                                            |
| G452   | Multiple and bilateral precerebral artery syndromes                                              |
| G454   | Transient global amnesia                                                                         |
| G458   | Other transient cerebral ischemic attacks and related syndromes                                  |
| G459   | Transient cerebral ischemic attack, unspecified                                                  |
| G460   | Middle cerebral artery syndrome                                                                  |
| G461   | Anterior cerebral artery syndrome                                                                |
| G462   | Posterior cerebral artery syndrome                                                               |
| G463   | Brain stem stroke syndrome                                                                       |
| G464   | Cerebellar stroke syndrome                                                                       |
| G465   | Pure motor lacunar syndrome                                                                      |
| G466   | Pure sensory lacunar syndrome                                                                    |
| G467   | Other lacunar syndromes                                                                          |
| G468   | Other vascular syndromes of brain in cerebrovascular diseases                                    |
| I6300  | Cerebral infarction due to thrombosis of unspecified precerebral artery                          |
| I63011 | Cerebral infarction due to thrombosis of right vertebral artery                                  |
| I63012 | Cerebral infarction due to thrombosis of left vertebral artery                                   |
| I63013 | Cerebral infarction due to thrombosis of bilateral vertebral arteries                            |
| I63019 | Cerebral infarction due to thrombosis of unspecified vertebral artery                            |
| I6302  | Cerebral infarction due to thrombosis of basilar artery                                          |
| I63031 | Cerebral infarction due to thrombosis of right carotid artery                                    |
| I63032 | Cerebral infarction due to thrombosis of left carotid artery                                     |
| I63033 | Cerebral infarction due to thrombosis of bilateral carotid arteries                              |
| I63039 | Cerebral infarction due to thrombosis of unspecified carotid artery                              |
| I6309  | Cerebral infarction due to thrombosis of other precerebral artery                                |
| I6310  | Cerebral infarction due to embolism of unspecified precerebral artery                            |
| I63111 | Cerebral infarction due to embolism of right vertebral artery                                    |
| I63112 | Cerebral infarction due to embolism of left vertebral artery                                     |
| I63113 | Cerebral infarction due to embolism of bilateral vertebral arteries                              |
| I63119 | Cerebral infarction due to embolism of unspecified vertebral artery                              |
| I6312  | Cerebral infarction due to embolism of basilar artery                                            |
| I63131 | Cerebral infarction due to embolism of right carotid artery                                      |
| I63132 | Cerebral infarction due to embolism of left carotid artery                                       |
| I63133 | Cerebral infarction due to embolism of bilateral carotid arteries                                |
| I63139 | Cerebral infarction due to embolism of unspecified carotid artery                                |
| I6319  | Cerebral infarction due to embolism of other precerebral artery                                  |
| I6320  | Cerebral infarction due to unspecified occlusion or stenosis of unspecified precerebral arteries |
| I63211 | Cerebral infarction due to unspecified occlusion or stenosis of right vertebral artery           |

|        |                                                                                              |
|--------|----------------------------------------------------------------------------------------------|
| I63212 | Cerebral infarction due to unspecified occlusion or stenosis of left vertebral artery        |
| I63213 | Cerebral infarction due to unspecified occlusion or stenosis of bilateral vertebral arteries |
| I63219 | Cerebral infarction due to unspecified occlusion or stenosis of unspecified vertebral artery |
| I6322  | Cerebral infarction due to unspecified occlusion or stenosis of basilar artery               |
| I63231 | Cerebral infarction due to unspecified occlusion or stenosis of right carotid arteries       |
| I63232 | Cerebral infarction due to unspecified occlusion or stenosis of left carotid arteries        |
| I63233 | Cerebral infarction due to unspecified occlusion or stenosis of bilateral carotid arteries   |
| I63239 | Cerebral infarction due to unspecified occlusion or stenosis of unspecified carotid artery   |
| I6329  | Cerebral infarction due to unspecified occlusion or stenosis of other precerebral arteries   |
| I6330  | Cerebral infarction due to thrombosis of unspecified cerebral artery                         |
| I63311 | Cerebral infarction due to thrombosis of right middle cerebral artery                        |
| I63312 | Cerebral infarction due to thrombosis of left middle cerebral artery                         |
| I63313 | Cerebral infarction due to thrombosis of bilateral middle cerebral arteries                  |
| I63319 | Cerebral infarction due to thrombosis of unspecified middle cerebral artery                  |
| I63321 | Cerebral infarction due to thrombosis of right anterior cerebral artery                      |
| I63322 | Cerebral infarction due to thrombosis of left anterior cerebral artery                       |
| I63323 | Cerebral infarction due to thrombosis of bilateral anterior cerebral arteries                |
| I63329 | Cerebral infarction due to thrombosis of unspecified anterior cerebral artery                |
| I63331 | Cerebral infarction due to thrombosis of right posterior cerebral artery                     |
| I63332 | Cerebral infarction due to thrombosis of left posterior cerebral artery                      |
| I63333 | Cerebral infarction due to thrombosis of bilateral posterior cerebral arteries               |
| I63339 | Cerebral infarction due to thrombosis of unspecified posterior cerebral artery               |
| I63341 | Cerebral infarction due to thrombosis of right cerebellar artery                             |
| I63342 | Cerebral infarction due to thrombosis of left cerebellar artery                              |
| I63343 | Cerebral infarction due to thrombosis of bilateral cerebellar arteries                       |
| I63349 | Cerebral infarction due to thrombosis of unspecified cerebellar artery                       |
| I6339  | Cerebral infarction due to thrombosis of other cerebral artery                               |
| I6340  | Cerebral infarction due to embolism of unspecified cerebral artery                           |
| I63411 | Cerebral infarction due to embolism of right middle cerebral artery                          |
| I63412 | Cerebral infarction due to embolism of left middle cerebral artery                           |
| I63413 | Cerebral infarction due to embolism of bilateral middle cerebral arteries                    |
| I63419 | Cerebral infarction due to embolism of unspecified middle cerebral artery                    |
| I63421 | Cerebral infarction due to embolism of right anterior cerebral artery                        |
| I63422 | Cerebral infarction due to embolism of left anterior cerebral artery                         |
| I63423 | Cerebral infarction due to embolism of bilateral anterior cerebral arteries                  |
| I63429 | Cerebral infarction due to embolism of unspecified anterior cerebral artery                  |
| I63431 | Cerebral infarction due to embolism of right posterior cerebral artery                       |
| I63432 | Cerebral infarction due to embolism of left posterior cerebral artery                        |
| I63433 | Cerebral infarction due to embolism of bilateral posterior cerebral arteries                 |
| I63439 | Cerebral infarction due to embolism of unspecified posterior cerebral artery                 |
| I63441 | Cerebral infarction due to embolism of right cerebellar artery                               |
| I63442 | Cerebral infarction due to embolism of left cerebellar artery                                |
| I63443 | Cerebral infarction due to embolism of bilateral cerebellar arteries                         |

|        |                                                                                                       |
|--------|-------------------------------------------------------------------------------------------------------|
| I63449 | Cerebral infarction due to embolism of unspecified cerebellar artery                                  |
| I6349  | Cerebral infarction due to embolism of other cerebral artery                                          |
| I6350  | Cerebral infarction due to unspecified occlusion or stenosis of unspecified cerebral artery           |
| I63511 | Cerebral infarction due to unspecified occlusion or stenosis of right middle cerebral artery          |
| I63512 | Cerebral infarction due to unspecified occlusion or stenosis of left middle cerebral artery           |
| I63513 | Cerebral infarction due to unspecified occlusion or stenosis of bilateral middle cerebral arteries    |
| I63519 | Cerebral infarction due to unspecified occlusion or stenosis of unspecified middle cerebral artery    |
| I63521 | Cerebral infarction due to unspecified occlusion or stenosis of right anterior cerebral artery        |
| I63522 | Cerebral infarction due to unspecified occlusion or stenosis of left anterior cerebral artery         |
| I63523 | Cerebral infarction due to unspecified occlusion or stenosis of bilateral anterior cerebral arteries  |
| I63529 | Cerebral infarction due to unspecified occlusion or stenosis of unspecified anterior cerebral artery  |
| I63531 | Cerebral infarction due to unspecified occlusion or stenosis of right posterior cerebral artery       |
| I63532 | Cerebral infarction due to unspecified occlusion or stenosis of left posterior cerebral artery        |
| I63533 | Cerebral infarction due to unspecified occlusion or stenosis of bilateral posterior cerebral arteries |
| I63539 | Cerebral infarction due to unspecified occlusion or stenosis of unspecified posterior cerebral artery |
| I63541 | Cerebral infarction due to unspecified occlusion or stenosis of right cerebellar artery               |
| I63542 | Cerebral infarction due to unspecified occlusion or stenosis of left cerebellar artery                |
| I63543 | Cerebral infarction due to unspecified occlusion or stenosis of bilateral cerebellar arteries         |
| I63549 | Cerebral infarction due to unspecified occlusion or stenosis of unspecified cerebellar artery         |
| I6359  | Cerebral infarction due to unspecified occlusion or stenosis of other cerebral artery                 |
| I636   | Cerebral infarction due to cerebral venous thrombosis, nonpyogenic                                    |
| I638   | Other cerebral infarction                                                                             |
| I639   | Cerebral infarction, unspecified                                                                      |
| I6501  | Occlusion and stenosis of right vertebral artery                                                      |
| I6502  | Occlusion and stenosis of left vertebral artery                                                       |
| I6503  | Occlusion and stenosis of bilateral vertebral arteries                                                |
| I6509  | Occlusion and stenosis of unspecified vertebral artery                                                |
| I651   | Occlusion and stenosis of basilar artery                                                              |
| I6521  | Occlusion and stenosis of right carotid artery                                                        |
| I6522  | Occlusion and stenosis of left carotid artery                                                         |
| I6523  | Occlusion and stenosis of bilateral carotid arteries                                                  |
| I6529  | Occlusion and stenosis of unspecified carotid artery                                                  |
| I658   | Occlusion and stenosis of other precerebral arteries                                                  |
| I659   | Occlusion and stenosis of unspecified precerebral artery                                              |
| I6601  | Occlusion and stenosis of right middle cerebral artery                                                |
| I6602  | Occlusion and stenosis of left middle cerebral artery                                                 |
| I6603  | Occlusion and stenosis of bilateral middle cerebral arteries                                          |
| I6609  | Occlusion and stenosis of unspecified middle cerebral artery                                          |
| I6611  | Occlusion and stenosis of right anterior cerebral artery                                              |
| I6612  | Occlusion and stenosis of left anterior cerebral artery                                               |
| I6613  | Occlusion and stenosis of bilateral anterior cerebral arteries                                        |
| I6619  | Occlusion and stenosis of unspecified anterior cerebral artery                                        |
| I6621  | Occlusion and stenosis of right posterior cerebral artery                                             |

|        |                                                                                         |
|--------|-----------------------------------------------------------------------------------------|
| I6622  | Occlusion and stenosis of left posterior cerebral artery                                |
| I6623  | Occlusion and stenosis of bilateral posterior cerebral arteries                         |
| I6629  | Occlusion and stenosis of unspecified posterior cerebral artery                         |
| I663   | Occlusion and stenosis of cerebellar arteries                                           |
| I668   | Occlusion and stenosis of other cerebral arteries                                       |
| I669   | Occlusion and stenosis of unspecified cerebral artery                                   |
| I672   | Cerebral atherosclerosis                                                                |
| I674   | Hypertensive encephalopathy                                                             |
| I677   | Cerebral arteritis, not elsewhere classified                                            |
| I6781  | Acute cerebrovascular insufficiency                                                     |
| I6782  | Cerebral ischemia                                                                       |
| I67841 | Reversible cerebrovascular vasoconstriction syndrome                                    |
| I67848 | Other cerebrovascular vasospasm and vasoconstriction                                    |
| I6789  | Other cerebrovascular disease                                                           |
| I679   | Cerebrovascular disease, unspecified                                                    |
| I680   | Cerebral amyloid angiopathy                                                             |
| I682   | Cerebral arteritis in other diseases classified elsewhere                               |
| I688   | Other cerebrovascular disorders in diseases classified elsewhere                        |
| I6901  | Cognitive deficits following nontraumatic subarachnoid hemorrhage                       |
| I69020 | Aphasia following nontraumatic subarachnoid hemorrhage                                  |
| I69021 | Dysphasia following nontraumatic subarachnoid hemorrhage                                |
| I69022 | Dysarthria following nontraumatic subarachnoid hemorrhage                               |
| I69023 | Fluency disorder following nontraumatic subarachnoid hemorrhage                         |
| I69028 | Other speech and language deficits following nontraumatic subarachnoid hemorrhage       |
| I6911  | Cognitive deficits following nontraumatic intracerebral hemorrhage                      |
| I69120 | Aphasia following nontraumatic intracerebral hemorrhage                                 |
| I69121 | Dysphasia following nontraumatic intracerebral hemorrhage                               |
| I69122 | Dysarthria following nontraumatic intracerebral hemorrhage                              |
| I69123 | Fluency disorder following nontraumatic intracerebral hemorrhage                        |
| I69128 | Other speech and language deficits following nontraumatic intracerebral hemorrhage      |
| I6921  | Cognitive deficits following other nontraumatic intracranial hemorrhage                 |
| I69220 | Aphasia following other nontraumatic intracranial hemorrhage                            |
| I69221 | Dysphasia following other nontraumatic intracranial hemorrhage                          |
| I69222 | Dysarthria following other nontraumatic intracranial hemorrhage                         |
| I69223 | Fluency disorder following other nontraumatic intracranial hemorrhage                   |
| I69228 | Other speech and language deficits following other nontraumatic intracranial hemorrhage |
| I6931  | Cognitive deficits following cerebral infarction                                        |
| I69320 | Aphasia following cerebral infarction                                                   |
| I69321 | Dysphasia following cerebral infarction                                                 |
| I69322 | Dysarthria following cerebral infarction                                                |
| I69323 | Fluency disorder following cerebral infarction                                          |
| I69328 | Other speech and language deficits following cerebral infarction                        |
| I6981  | Cognitive deficits following other cerebrovascular disease                              |

|        |                                                                                  |
|--------|----------------------------------------------------------------------------------|
| 169820 | Aphasia following other cerebrovascular disease                                  |
| 169821 | Dysphasia following other cerebrovascular disease                                |
| 169822 | Dysarthria following other cerebrovascular disease                               |
| 169823 | Fluency disorder following other cerebrovascular disease                         |
| 169828 | Other speech and language deficits following other cerebrovascular disease       |
| 16991  | Cognitive deficits following unspecified cerebrovascular disease                 |
| 169920 | Aphasia following unspecified cerebrovascular disease                            |
| 169921 | Dysphasia following unspecified cerebrovascular disease                          |
| 169922 | Dysarthria following unspecified cerebrovascular disease                         |
| 169923 | Fluency disorder following unspecified cerebrovascular disease                   |
| 169928 | Other speech and language deficits following unspecified cerebrovascular disease |
